# Supplementary material for: A mussel-inspired osteogenesis microenvironment with bioactive peptides for the dual-functionalization of biomedical substrates
Source: Royal Society of Chemistry journal article supplement (doi:10.1039/d0nj02997a), 2020-01-01
Supplement: d0nj02997a1.pdf [file d0nj02997a1.pdf]

*New Journal of Chemistry*

**Mussel-inspired osteogenesis microenvironment with bioactive  
peptides for dual-functionalization of biomedical substrates**

Yuanyuan Jiang, Yang Xu\*

The First Affiliated Hospital of Xiamen University, Xiamen 361003, PR China

Author information:

\*Corresponding Author: Yang Xu, E-mail: xuyang19792007@xmu.edu.cn

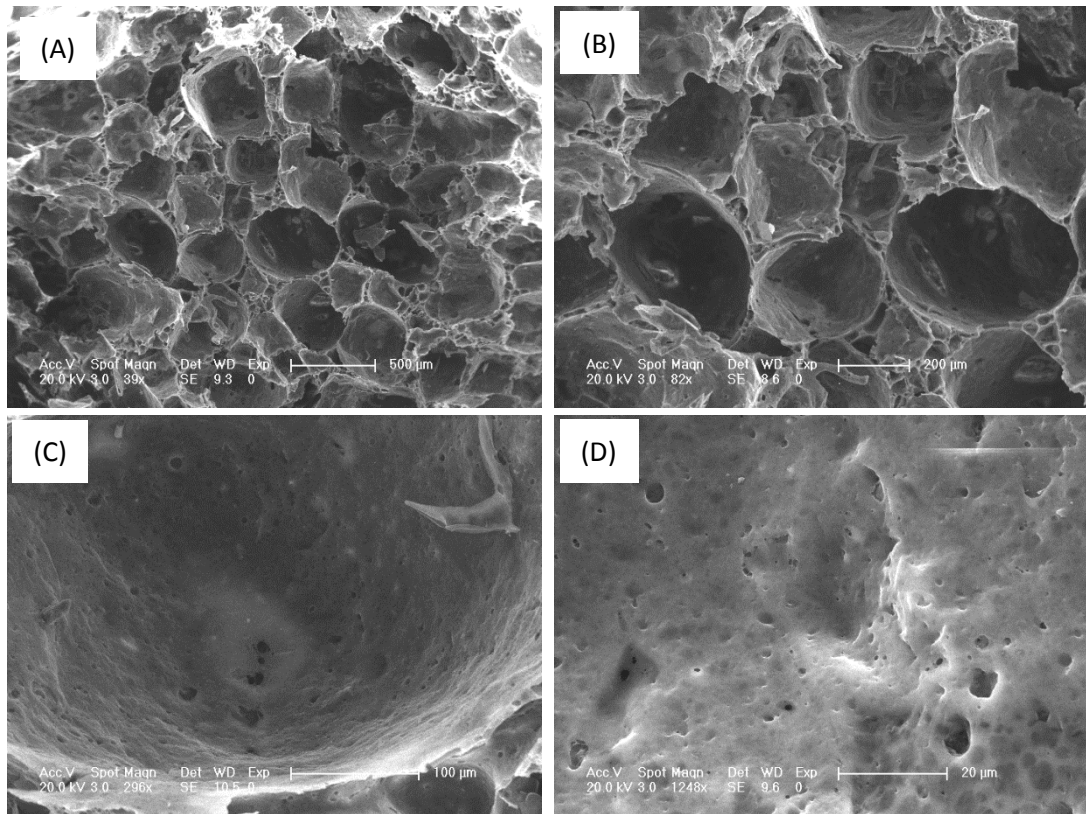

Figure S1. SEM images of HA/PLGA porous scaffolds. The scale bar lengths are 500  $\mu\text{m}$ , 200  $\mu\text{m}$ , 100  $\mu\text{m}$  and 20  $\mu\text{m}$ , respectively.

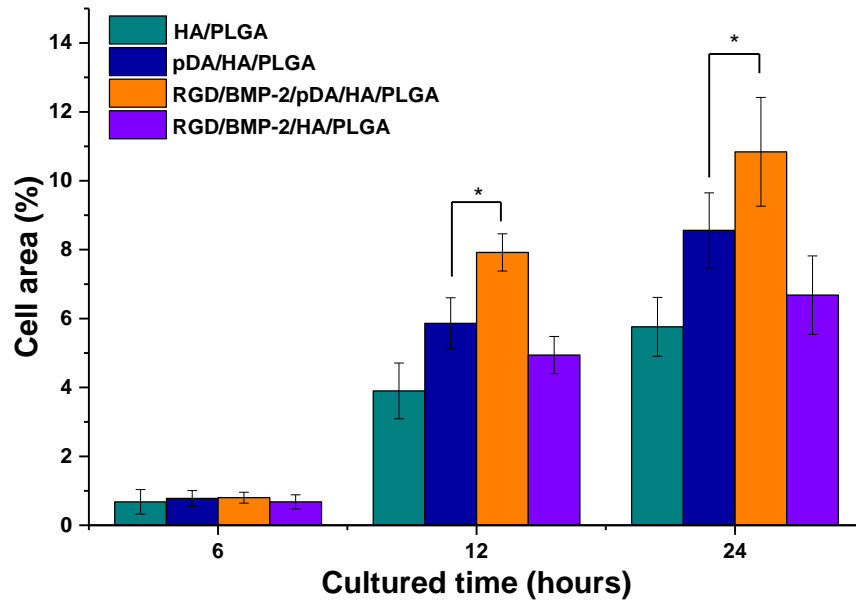

Figure S2. Percentage of cell area cultured on the different substrates for 6, 12, and 24 h. \*  $p < 0.05$ , indicating statistical significance.

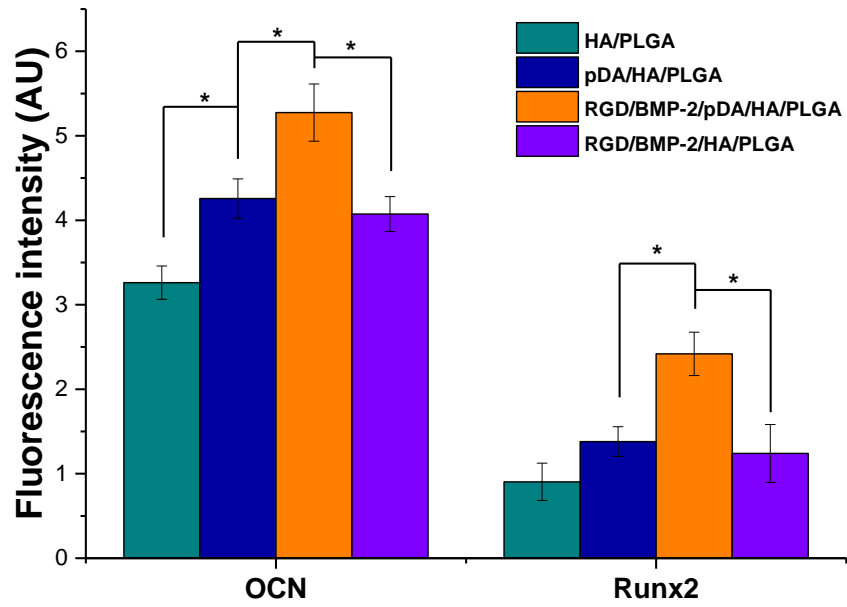

Figure S3. Quantified fluorescence intensity of cells cultured on the different substrates for 7 days.

\*  $p < 0.05$ , indicating statistical significance.
